# Supplementary material
Source: HighWire-hosted journal article supplement (https://ijgc.bmj.com/content/31/5/744)
Supplement: inline-supplementary-material-2 [file inline-supplementary-material-2.pdf]

| QUADAS-2                   |                   |            |                    |                 |                        |            |                    |
|----------------------------|-------------------|------------|--------------------|-----------------|------------------------|------------|--------------------|
| STUDY                      | RISK OF BIAS      |            |                    |                 | APPLICABILITY CONCERNS |            |                    |
|                            | Patient selection | Index test | Reference standard | Flow and timing | Patient selection      | Index test | Reference standard |
| Abu-Rustum et al, 2009     |                   |            |                    |                 |                        |            |                    |
| Altgassen et al, 2009      |                   |            |                    |                 |                        |            |                    |
| Backes et al, 2019         |                   |            |                    |                 |                        |            |                    |
| Barlin et al, 2012         |                   |            |                    |                 |                        |            |                    |
| Bats et al, 2008           |                   |            |                    |                 |                        |            |                    |
| Bese et al, 2016           |                   |            |                    |                 |                        |            |                    |
| Delpuch et al, 2007        |                   |            |                    |                 |                        |            |                    |
| Ferraioli et al, 2015      |                   |            |                    |                 |                        |            |                    |
| Hagen et al, 2016          |                   |            |                    |                 |                        |            |                    |
| Khoury-Collado et al, 2011 |                   |            |                    |                 |                        |            |                    |
| Kim et al, 2013            |                   |            |                    |                 |                        |            |                    |
| Kostun et al, 2018         |                   |            |                    |                 |                        |            |                    |
| Mosgaard et al, 2013       |                   |            |                    |                 |                        |            |                    |
| Rossi et al, 2017          |                   |            |                    |                 |                        |            |                    |
| Touhami et al, 2015        |                   |            |                    |                 |                        |            |                    |

Low risk   
 High risk   
 Unclear risk
